# Supplementary material
Source: publisher figshare collection journal article supplement (https://karger.figshare.com/articles/dataset/_/5123779)
Supplement: Supplementary file 1 [file 1]

### **Video figure Legend**

The patient showed slow gait velocity and freezing before arrival at a narrowed entrance or in while walking on an originally designed, suddenly narrowed path (path A). The gait variability was resolved on a path that narrowed in a straight-line fashion (path B). We have received informed consent from the patient for publishing the video.
